# Supplementary material for: Loss of adenosine A3 receptors accelerates skeletal muscle regeneration in mice following cardiotoxin-induced injury
Source: PubMed Central journal article supplement (PMC10613231; doi:10.1038/s41419-023-06228-7), 2023-10-28
Supplement: 41419_2023_6228_MOESM3_ESM.pdf [file 41419_2023_6228_MOESM3_ESM.pdf]

**Supplementary table 1: A3R<sup>-/-</sup> mice are characterized by decreased grip force and voluntary running speed.**

|                                        |                            |                            |
|----------------------------------------|----------------------------|----------------------------|
| Grip force                             | A3R <sup>+/+</sup> (n = 5) | A3R <sup>-/-</sup> (n = 5) |
| Body weight (g)                        | 27.96 ± 0.28               | 26.9 ± 0.74                |
| Maximal force (mN)                     | 161.94 ± 7.13              | 122.79 ± 3.44**            |
| Force normalized to body weight (nM/g) | 5.8 ± 0.27                 | 4.57 ± 0.07**              |
| Voluntary running                      | A3R <sup>+/+</sup> (n = 4) | A3R <sup>-/-</sup> (n = 5) |
| Distance (m/day)                       | 7805 ± 262.6               | 8002.8 ± 201.7             |
| Average speed (m/min)                  | 13.2 ± 0.5                 | 11.6 ± 0.2*                |
| Max speed (m/min)                      | 24.9 ± 0.8                 | 19.3 ± 0.4***              |
| Forced running                         | A3R <sup>+/+</sup> (n = 5) | A3R <sup>-/-</sup> (n = 5) |
| Time (min)                             | 15.55 ± 0.48               | 16.8 ± 1.0                 |
| Distance (m/day)                       | 347.6 ± 13.6               | 386.5 ± 31.3               |

Mean values ± SD are shown, and statistical significance was determined by two-tailed Student's *t* test. \*p < 0.05, \*\* p < 0,01, and \*\*\* p < 0.001.
