# Supplementary material for: Loss of adenosine A3 receptors accelerates skeletal muscle regeneration in mice following cardiotoxin-induced injury
Source: PubMed Central journal article supplement (PMC10613231; doi:10.1038/s41419-023-06228-7), 2023-10-28
Supplement: 41419_2023_6228_MOESM4_ESM.pdf [file 41419_2023_6228_MOESM4_ESM.pdf]

**Supplementary table 2: Normal EDL and increased SOL muscle force in the absence of A3R**

| EDL muscle                      | TWITCH                      |                             | TETANUS                     |                             |
|---------------------------------|-----------------------------|-----------------------------|-----------------------------|-----------------------------|
|                                 | A3R <sup>+/+</sup> (n = 10) | A3R <sup>-/-</sup> (n = 10) | A3R <sup>+/+</sup> (n = 10) | A3R <sup>-/-</sup> (n = 10) |
| EDL Force (mN/mm <sup>2</sup> ) | 1.6 ± 0.19                  | 1.59 ± 0.12                 | 7.24 ± 0.76                 | 7.35 ± 0.47                 |
| SOL Force (mN/mm <sup>2</sup> ) | 1.87 ± 0.16                 | 2.46 ± 0.21*                | 9.21 ± 0.64                 | 12.22 ± 1.14*               |

Mean values ± SD are shown, and statistical significance was determined by two-tailed Student's *t* test. \**p* < 0.05.
